# Supplementary material for: Fluorescence turn-on detection of iodide, iodate and total iodine using fluorescein-5-isothiocyanate-modified gold nanoparticles
Source: Royal Society of Chemistry journal article supplement (doi:10.1039/b905426j), 2009-01-01
Supplement: b905426j.pdf [file b905426j.pdf]

## Electronic supplementary information

### Fluorescence Turn-On Detection of Iodide, Iodate and Total Iodine Using

### Fluorescein-5-Isothiocyanate-Modified Gold Nanoparticles

Yi-Ming, Chen,<sup>a</sup> Tian-Lu Cheng,<sup>b, c</sup> and Wei-Lung Tseng<sup>a, c\*</sup>

<sup>a</sup> Department of Chemistry, National Sun Yat-sen University, Taiwan

<sup>b</sup> Faculty of Biomedical Science and Environmental Biology, Kaohsiung Medical University, Kaohsiung, Taiwan

<sup>c</sup> National Sun Yat-sen University-Kaohsiung Medical University Joint Research Center, Kaohsiung, Taiwan

\*Correspondence: Dr. Wei-Lung Tseng, Department of Chemistry, National Sun Yat-sen University, 70, Lien-hai Road, Kaohsiung, Taiwan 804.

Tel: 011-886-7-52520325

Fax: 011-886-7-3684046.

E-mail: [tsengwl@mail.nsysu.edu.tw](mailto:tsengwl@mail.nsysu.edu.tw)

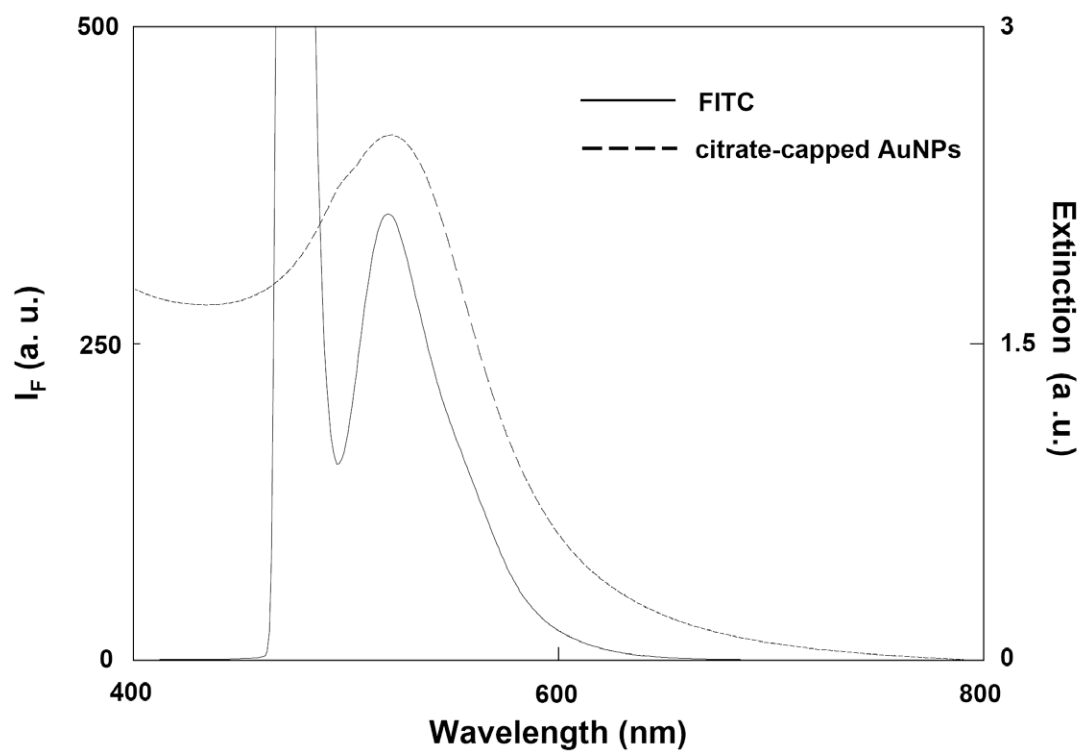

**Fig. S1.** Fluorescence spectra of 0.1  $\mu$ M FITC and extinction spectra of 15.0 nM citrate-capped AuNPs. The excitation wavelength for FITC was set at 470 nm. The fluorescence intensities ( $I_F$ ) are plotted in arbitrary unit (a. u.).

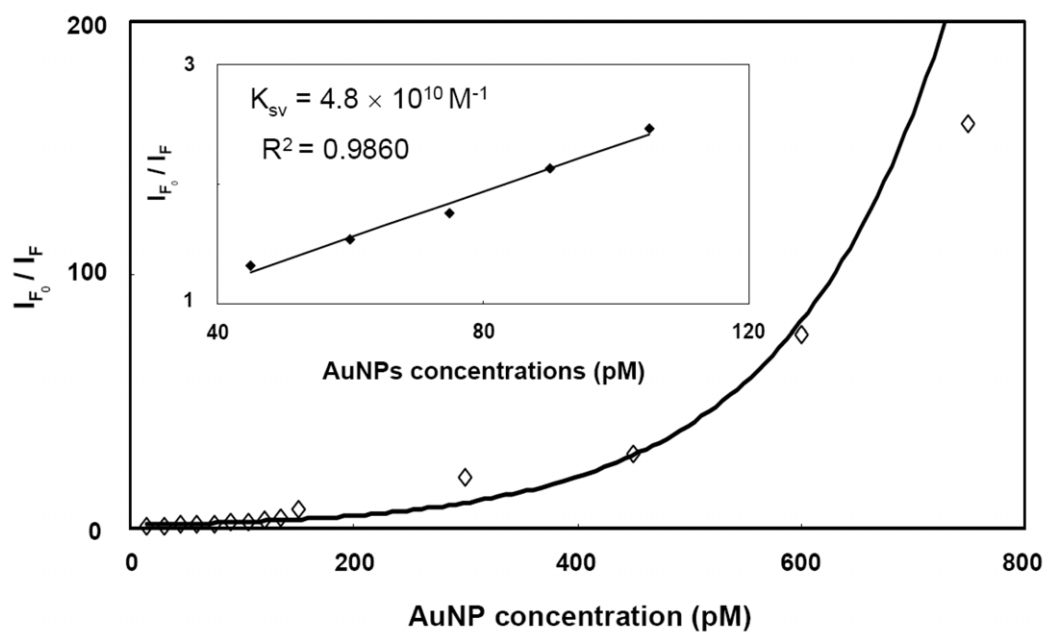

**Fig. S2.** Stern-Volmer plots of the fluorescence quenching of FITC (0.1 μM) by AuNPs. The FITC is prepared in 20 mM phosphate solution at pH 7.0

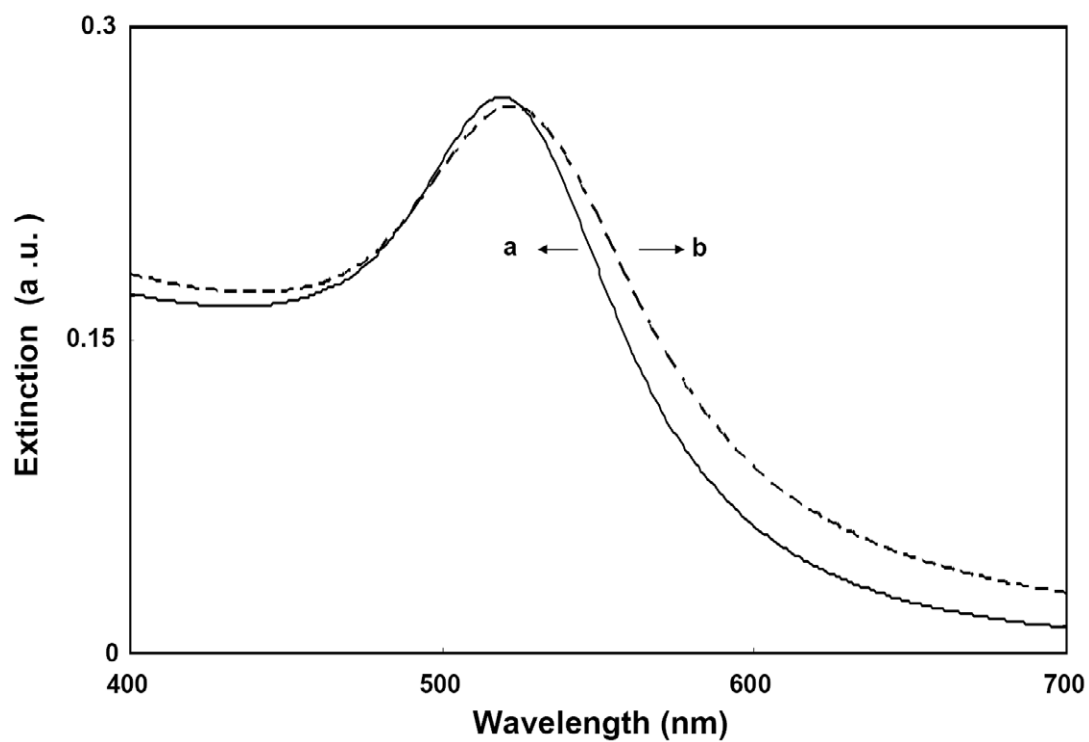

**Fig. S3.** Extinction spectra of 1.5 nM FITC-AuNPs in the (a) absence and (b) presence of 10.0  $\mu\text{M}$   $\text{I}^-$ . Buffer: 20 mM phosphate solution, pH 8.0.

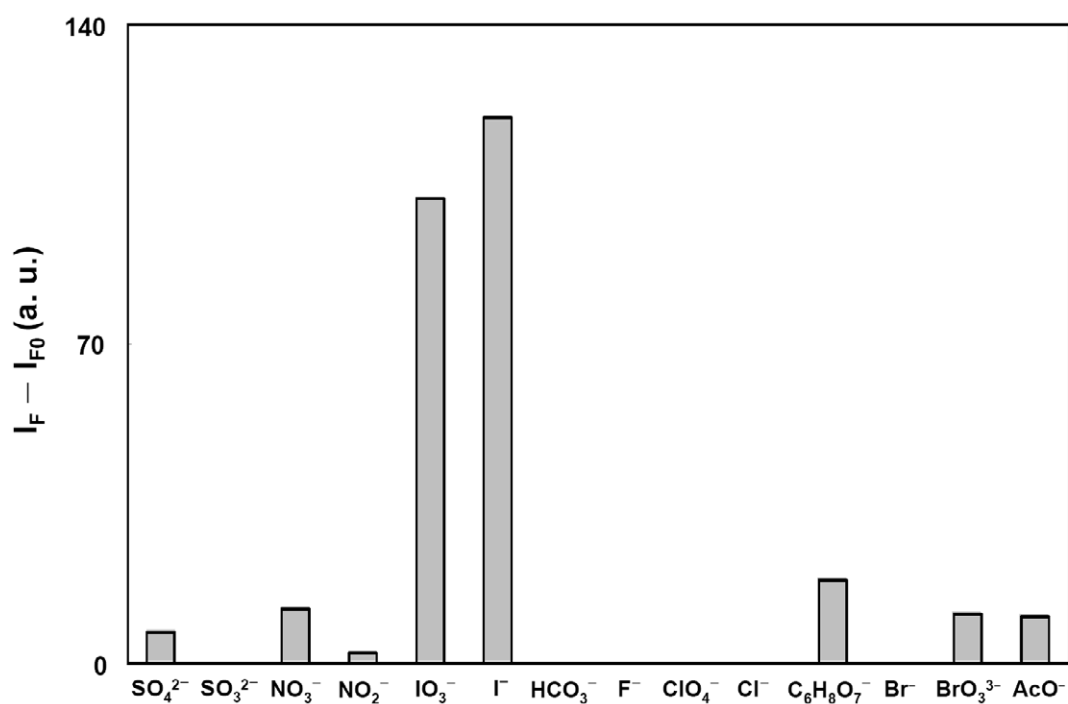

**Fig. S4.** The difference in fluorescence intensity of 1.5 nM FITC-AuNPs before and after the addition of  $\text{I}^-$  (0.1  $\mu\text{M}$ ),  $\text{IO}_3^-$  (0.1  $\mu\text{M}$ ), and other anions (1.0  $\mu\text{M}$ ). The anions were pretreated with 5 mM ascorbic acid for 10 min. Buffer: 20 mM phosphate solution, pH 8.0. The excitation wavelength was set at 470 nm. The incubation time was 20 min

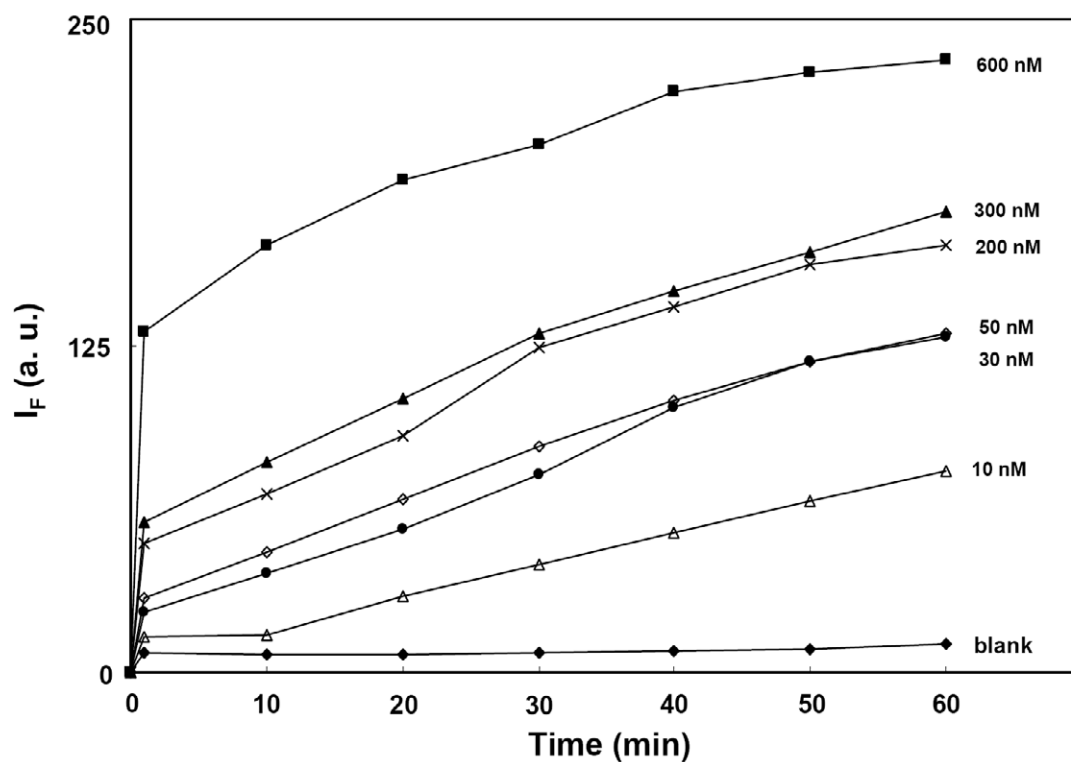

**Fig. S5.** Time evolution measurement of fluorescence intensity of 1.5 nM FITC-AuNPs upon the addition of 0–600.0 nM  $I^-$ . They were pretreated with 5 mM ascorbic acid for 10 min. Buffer: 20 mM phosphate solution, pH 8.0. The excitation wavelength was set at 470 nm.

**Table S1.**

A comparison of other assays for the detection of I<sup>-</sup>.

| Reagents <sup>a</sup>                                      | Detection                | Linear ranges (μM) | Test anions <sup>b</sup>                                                                                                                                                                                                                                                                                                                                                                                                         | Reference                 |
|------------------------------------------------------------|--------------------------|--------------------|----------------------------------------------------------------------------------------------------------------------------------------------------------------------------------------------------------------------------------------------------------------------------------------------------------------------------------------------------------------------------------------------------------------------------------|---------------------------|
| Luminol–HTAC reversed micelle system                       | Luminescence             | 0.6 to 60.0        | Br <sup>-</sup> , Cl <sup>-</sup> , CH <sub>3</sub> COO <sup>-</sup> , PO <sub>4</sub> <sup>3-</sup> , NO <sub>3</sub> <sup>-</sup> , NO <sub>2</sub> <sup>-</sup> , CO <sub>3</sub> <sup>2-</sup> , SO <sub>4</sub> <sup>2-</sup> , S <sup>2-</sup>                                                                                                                                                                             | Fujiwara et al. 2000      |
| Pyrene is covalently anchored on delaminated zeolite ITQ-2 | Fluorescence quenching   | 2000.0 to 100000.0 | Br <sup>-</sup> , Cl <sup>-</sup> , F <sup>-</sup> ,                                                                                                                                                                                                                                                                                                                                                                             | Corma et al. 2002         |
| Cationic polythiophene derivative                          | Fluorescence quenching   | 2.0 to 11.0        | Br <sup>-</sup> , Cl <sup>-</sup> , F <sup>-</sup> , CO <sub>3</sub> <sup>2-</sup> , HCO <sub>3</sub> <sup>-</sup> , H <sub>2</sub> PO <sub>4</sub> <sup>-</sup> , HPO <sub>4</sub> <sup>2-</sup> , CH <sub>3</sub> COO <sup>-</sup> , EDTA <sup>4-</sup> , SO <sub>4</sub> <sup>2-</sup> , (C <sub>6</sub> H <sub>5</sub> ) <sub>4</sub> B <sup>-</sup>                                                                         | Ho and Leclerc 2003       |
| Membrane contains quinine and benzothioxanthene derivative | Ratiometric fluorescence | 200.0 to 6000.0    | SO <sub>4</sub> <sup>2-</sup> , NO <sub>3</sub> <sup>-</sup> , HCO <sub>3</sub> <sup>-</sup> , F <sup>-</sup> , Cl <sup>-</sup> , Br <sup>-</sup> , CH <sub>3</sub> COO <sup>-</sup> , H <sub>2</sub> PO <sub>4</sub> <sup>-</sup> , SCN <sup>-</sup> , C <sub>4</sub> H <sub>4</sub> O <sub>6</sub> <sup>2-</sup> , C <sub>6</sub> H <sub>8</sub> O <sub>7</sub> <sup>3-</sup> , DB,                                            | Nie et al. 2005           |
| Carbazole-containing conjugated copolymer                  | Fluorescence quenching   | 0.4 to 2.0         | Br <sup>-</sup> , Cl <sup>-</sup> , F <sup>-</sup> , ClO <sub>4</sub> <sup>-</sup> , H <sub>2</sub> PO <sub>4</sub> <sup>-</sup> , HS <sup>-</sup>                                                                                                                                                                                                                                                                               | Vetrichevan et al. 2006   |
| DBT-Hg(II) complex                                         | Fluorescence enhancement | 0.45 to 4.50       | S <sup>2-</sup> , EDTA <sup>4-</sup> , SCN <sup>-</sup> , CH <sub>3</sub> CO <sub>2</sub> <sup>-</sup> , Br <sup>-</sup> , Cl <sup>-</sup> , F <sup>-</sup> , H <sub>2</sub> PO <sub>4</sub> <sup>-</sup> , SO <sub>4</sub> <sup>2-</sup>                                                                                                                                                                                        | Lin et al. 2007           |
| Benzimidazole-based tripodal receptor                      | Fluorescence quenching   | 0.2 to 5.0         | Br <sup>-</sup> , Cl <sup>-</sup> , F <sup>-</sup> , NO <sub>3</sub> <sup>-</sup> , HSO <sub>4</sub> <sup>-</sup> , CH <sub>3</sub> COO <sup>-</sup> , H <sub>2</sub> PO <sub>4</sub> <sup>-</sup>                                                                                                                                                                                                                               | Singh and Jang 2007       |
| Immobilization of MC on triacetylcellulose polymer         | Absorbance               | 3.9 to 5500.0      | CO <sub>3</sub> <sup>2-</sup> , NO <sub>3</sub> <sup>-</sup> , Br <sup>-</sup> , Cl <sup>-</sup> , F <sup>-</sup> , C <sub>2</sub> O <sub>4</sub> <sup>2-</sup>                                                                                                                                                                                                                                                                  | Rastegarzadeh et al. 2008 |
| FITC-AuNPs                                                 | Fluorescence enhancement | 0.01 to 0.6        | SO <sub>4</sub> <sup>2-</sup> , SO <sub>3</sub> <sup>2-</sup> , NO <sub>3</sub> <sup>-</sup> , NO <sub>2</sub> <sup>-</sup> , I <sup>-</sup> , IO <sub>3</sub> <sup>-</sup> , HCO <sub>3</sub> <sup>-</sup> , F <sup>-</sup> , ClO <sub>4</sub> <sup>-</sup> , Cl <sup>-</sup> , C <sub>6</sub> H <sub>8</sub> O <sub>7</sub> <sup>3-</sup> , Br <sup>-</sup> , BrO <sub>3</sub> <sup>-</sup> , CH <sub>3</sub> COO <sup>-</sup> | This study                |

<sup>a</sup> HTAC, hexadecyltrimethylammonium chloride; DBT, p-((dimethylamino)benzylidene)thiosemicarbazide; MC, methyltrioctylammonium chloride; <sup>b</sup> DB, dodecylbenzenesulphonate.

## References

- A. Corma, M. S. Galletero, H. García, E. Palomares and R. Fernando, *Chem. Commun.*, 2002, **10**, 1100-1101.
- T. Fujiwara, I. U. Mohammadzai, H. Inoue and T. Kumamaru, *Analyst*, 2000, **125**, 759-763.
- M. Leclerc and H. A. Ho, *J. Am. Chem. Soc.*, 2003, **125**, 4412-4413.
- L.-R. Lin, W. Fang, Y. Yu, R.-B. Huang and L.-S. Zheng, *Spectrochimica Acta A*, 2007, **67**, 1403-1406.
- C.-G. Niu, A.-L. Guan, G.-M. Zeng, Y.-G. Liu, G.-H. Huang, P. -F. Gao and X.-Q. Gui, *Analytica Chimica Acta*, 2005, **547**, 221-228.
- S. Rastegarzadeh, N. Pourreza and I. Saeedi, *Talanta*, 2009, **77**, 1032-1036.
- N. Singh and D. O. Jang, *Organic Letters*, 2007, **9**, 1991-1994.
- M. Vetrichelvan, R. Nagarajan and S. Valiyaveetil, *Macromolecules*, 2006, **39**, 8303-8310.
